# Supplementary material for: Bilberry anthocyanin improves the serum cholesterol in aging perimenopausal rats via the estrogen receptor signaling pathway
Source: Royal Society of Chemistry journal article supplement (doi:10.1039/c9fo00639g), 2019-01-01
Supplement: c9fo00639g1.pdf [file c9fo00639g1.pdf]

## 1 Supplementary Figure 1

2

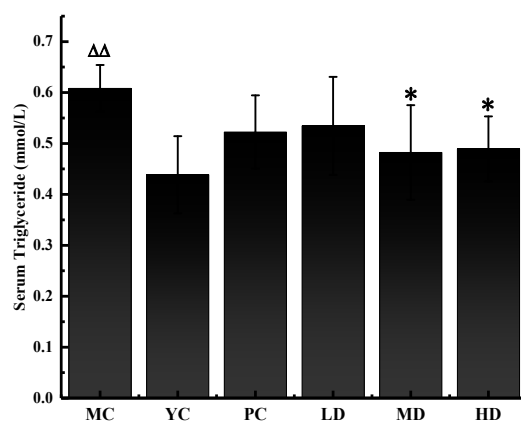

3

4

SFig 1 The level of serum triglyceride

5 The means marked with superscript symbols are significantly different relative to others. MC was compared with  
6 the YC,  $\Delta P < 0.05$ ,  $\Delta\Delta P < 0.01$ ; each dose group was compared with the MC,  $*P < 0.05$ .

7

8
